# Supplementary material for: Reductive evolution and unique predatory mode in the CPR bacterium Vampirococcus lugosii
Source: PubMed Central journal article supplement (PMC8080830; doi:10.1038/s41467-021-22762-4), 2021-04-28
Supplement: 41467_2021_22762_MOESM1_ESM.pdf [file 41467_2021_22762_MOESM1_ESM.pdf]

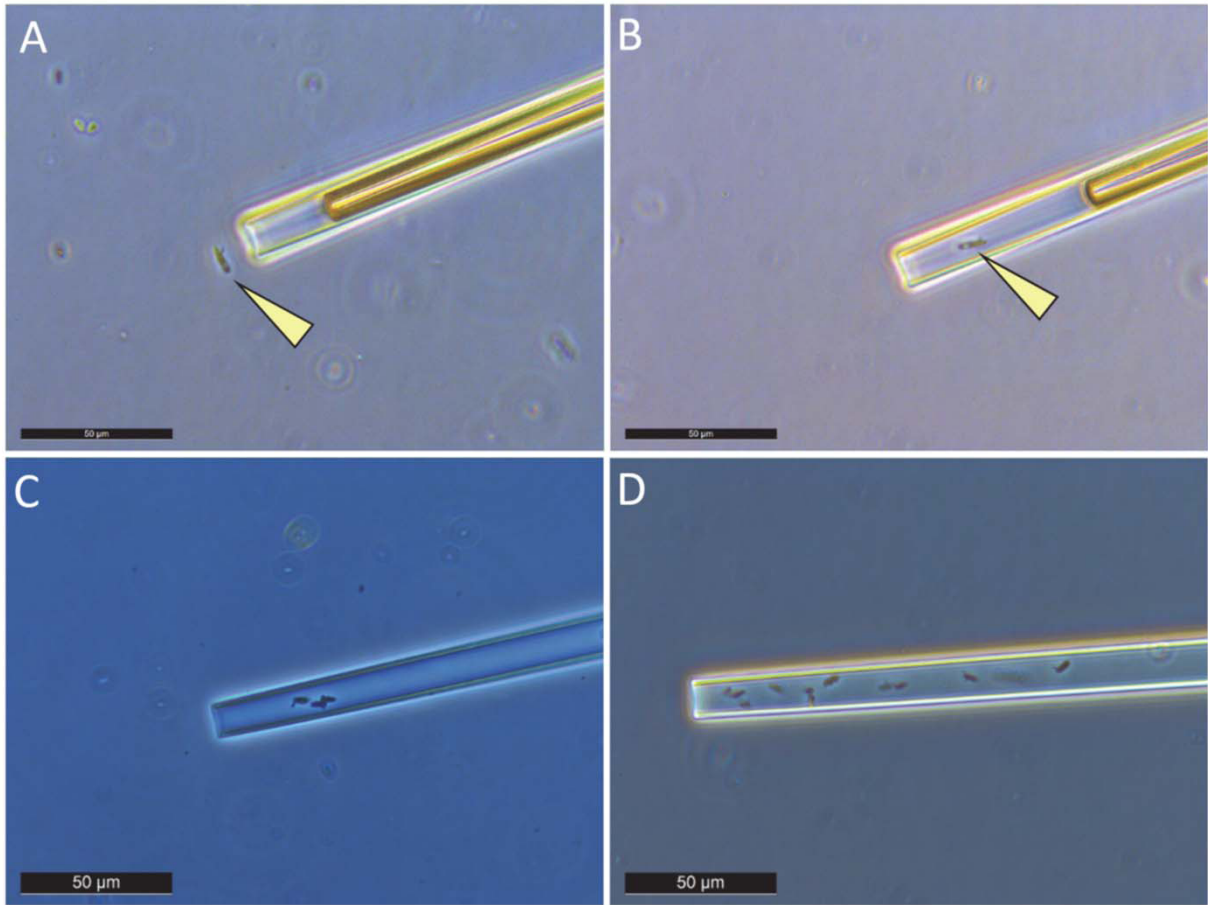

**Supplementary Fig. 1|** Phase contrast microscopy images of micromanipulation of cells infected by *Vampirococcus* using a glass capillary. Yellow arrows in panels A and B indicate the same infected cells outside and inside the capillary. Panels C and D show capillaries containing several infected cells. We collected 3 sets of 10 *Vampirococcus*+host cells that were used for independent whole genome amplification experiments.

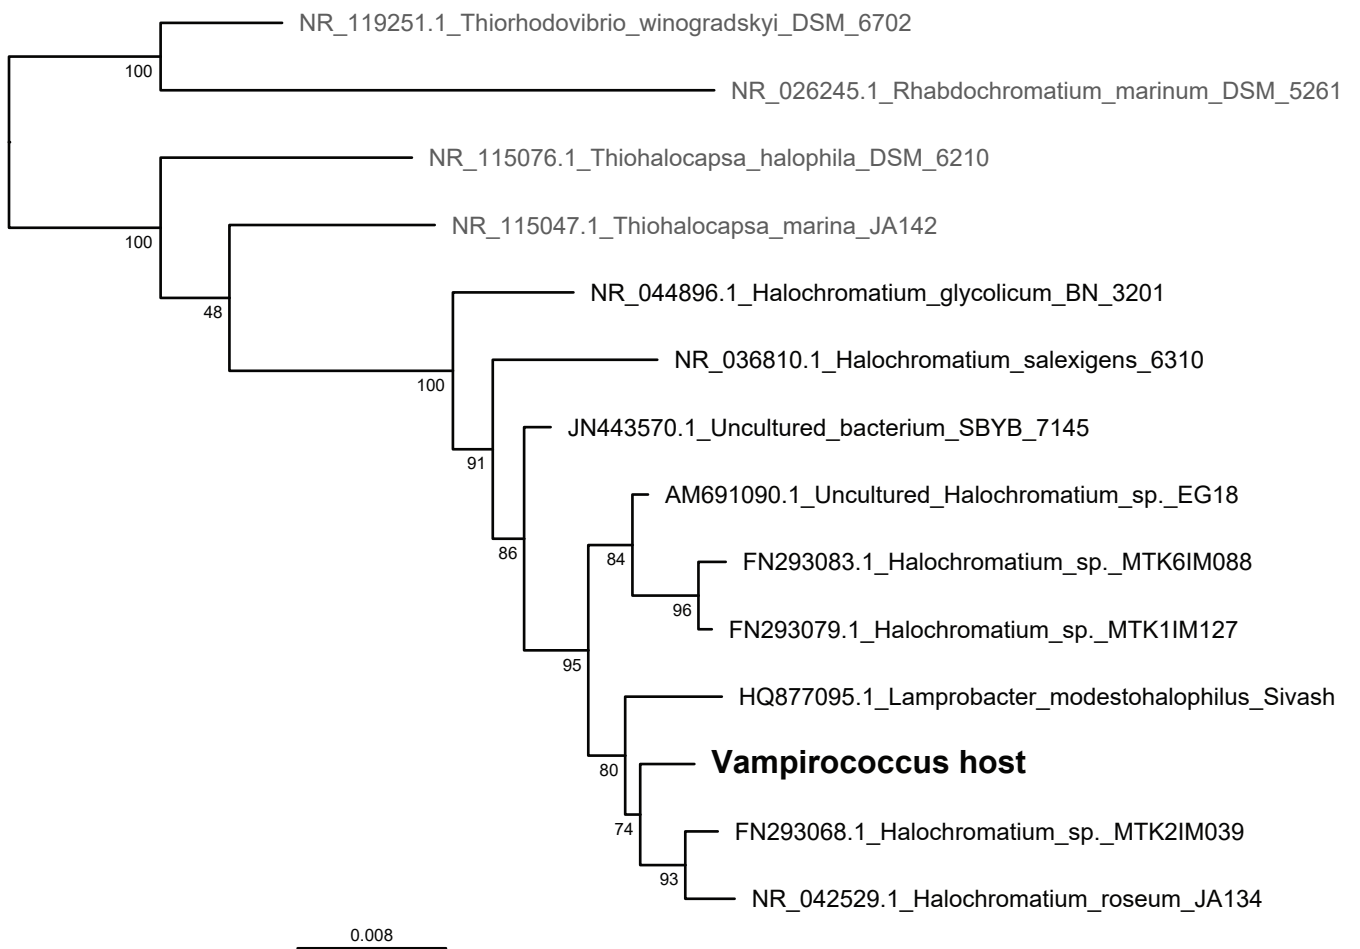

**Supplementary Fig. 2** | 16S rRNA gene maximum likelihood phylogenetic tree of the *Vampirococcus* host. The tree is based on 1425 conserved aligned positions. Numbers at nodes are bootstrap support values (100 replicates).

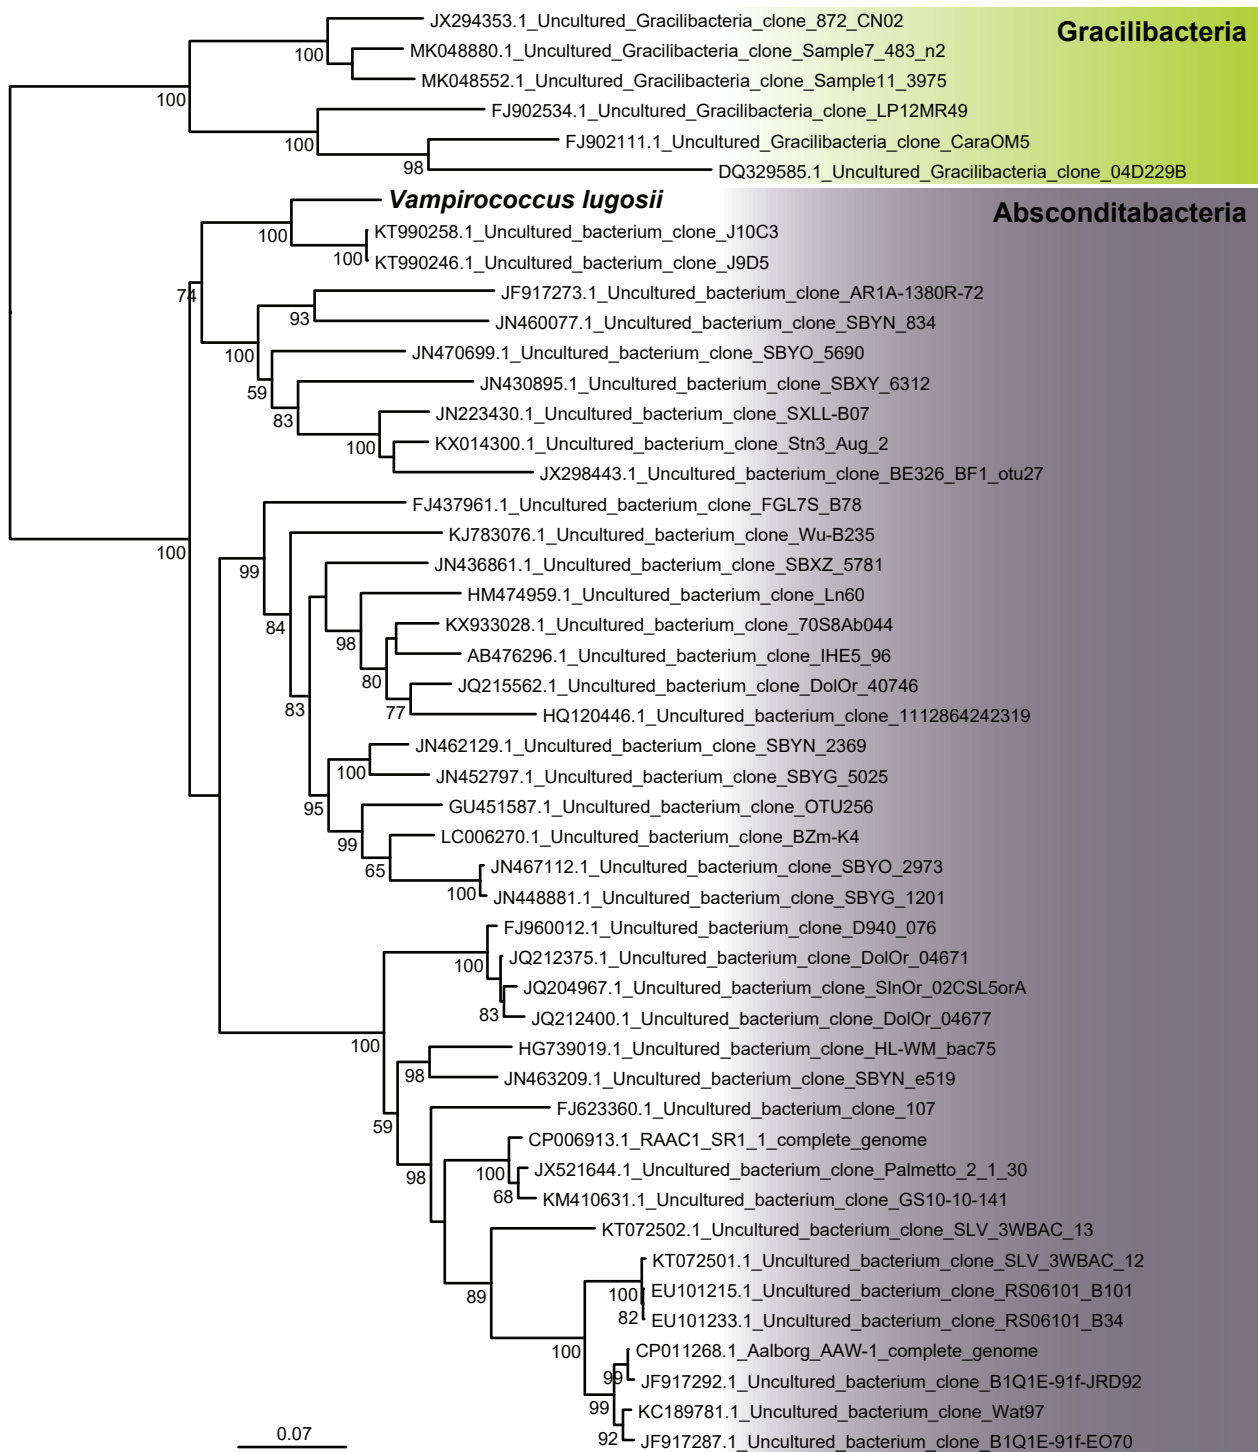

**Supplementary Fig. 3** | 16S rRNA gene maximum likelihood phylogenetic tree of *Vampirococcus*. The tree is based on 1282 conserved aligned positions. Numbers at nodes are bootstrap support values (100 replicates). The tree is rooted on several Gracilibacteria sequences.

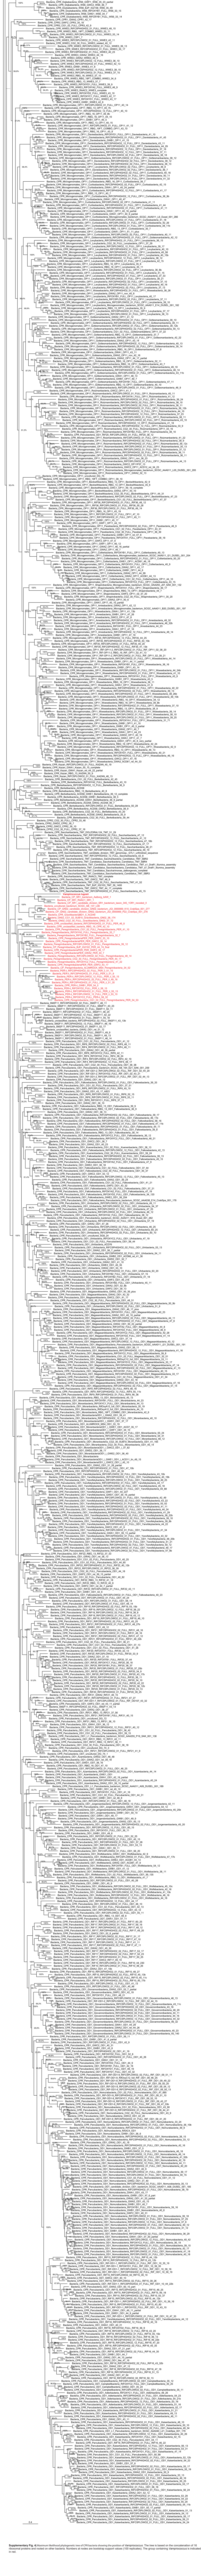

Supplemental Fig. 4 | Maximum likelihood phylogenetic tree of 16S rDNA sequences from 16 ribosomal proteins. The tree is rooted at the top and shows a highly branched structure with numerous bootstrap values indicated at the nodes. The sequences are labeled with their respective protein names and accession numbers, such as 'Bacteria\_CPR\_Diapherotrites\_WISS\_GW2\_34', 'Bacteria\_CPR\_Microgenomates\_OP11\_Diapherotrites\_WISS\_GW2\_34', etc. The tree is divided into several major clades, including Vampirococcales legum, Bacillus, Clostridia, and various other bacterial groups. The x-axis represents the concentration of 16S rDNA, and the y-axis represents the maximum likelihood bootstrap values. The tree is highly detailed, with many branches and nodes labeled with their respective values.

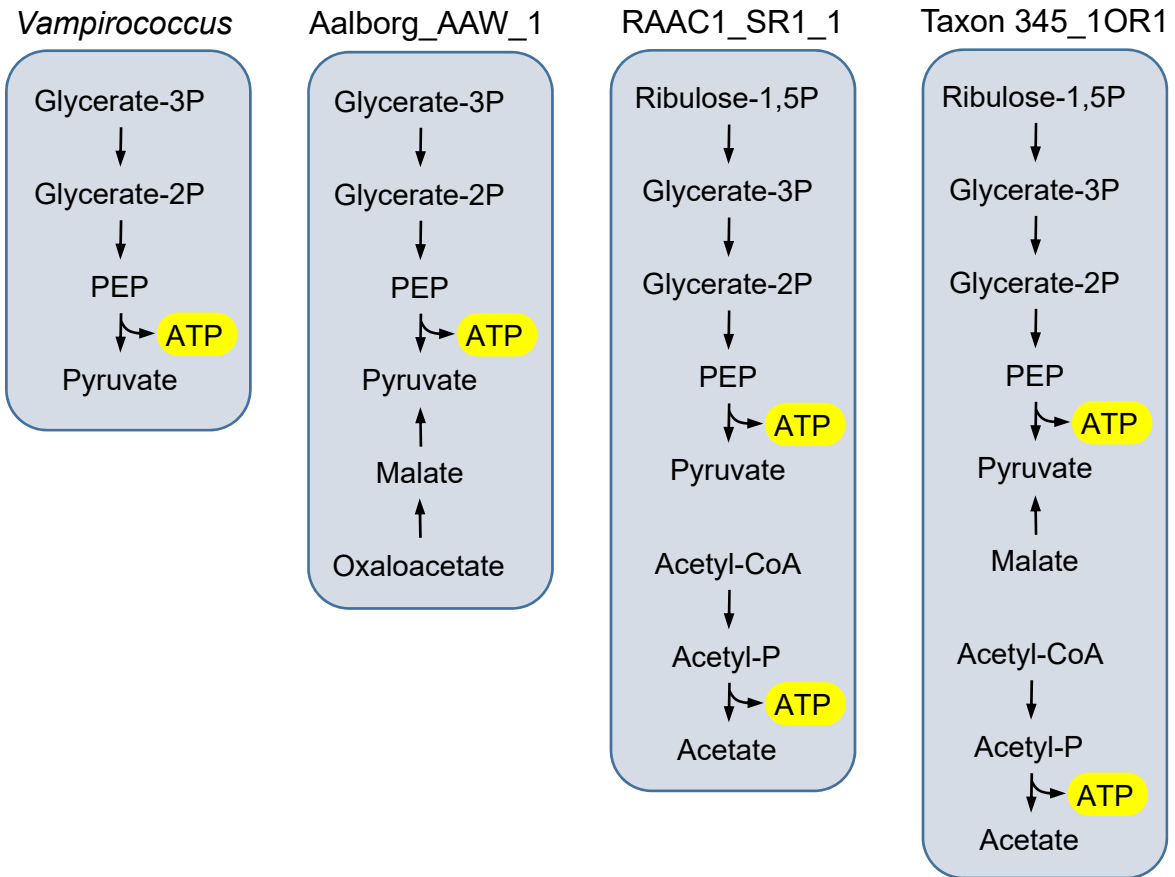

**Supplementary Fig. 5** | ATP production pathways in *Vampirococcus* and three representative Absconditabacteria.

|                                     |                                                                       |                              |
|-------------------------------------|-----------------------------------------------------------------------|------------------------------|
| <i>Acetobacterium woodii</i>        | GLAMVAGVPGIGQGF AAGKGA EAVGKNPTKSNDIVMIMLLGAAVAETS G I FSLVIALILLFANP | (Na <sup>+</sup> -dependent) |
| <i>Ilyobacter tartaricus</i>        | GTAMIAGIGPGVGQGYAAGKAVESVARQPEAKGDIISTMVLGQAV AESTGIYSLVIALILLYANP    | (Na <sup>+</sup> -dependent) |
| <i>Propionigenium modestum</i>      | GAAMIAGIGPGVGQGYAAGKAVESVARQPEAKGDIISTMVLGQAIAESTGIYSLVIALILLYANP     | (Na <sup>+</sup> -dependent) |
| <i>Fusobacterium nucleatum</i>      | GLAMIAGLPGIGEGYAAGKAVESVARQPEARGSIISTMILGQAV AESTGIYSLVIALILLYANP     | (Na <sup>+</sup> -dependent) |
| <b><i>Vampirococcus lugosii</i></b> | LAIWLSWLWVWIWQGR LIVWALWAINRNPEIKNKIMTFMVLFIALIEVTAIYWLIIVFNIMWWLE    | ?                            |
| <i>Thermacetogenium phaeum</i>      | LVMGIATIGPALGQGTAAAKALEGMSRQPEMSGELRTTLIIAMAFMEALTIYGLLIAFLLLKMG      | (H <sup>+</sup> -dependent)  |
| <i>Synechococcus elongatus</i>      | LAVGLAAIGPGIGQGSAAQAVEGIARQPEAEGKIRGTL LLSLAFMEALTIYGLVVALVLLFANP     | (H <sup>+</sup> -dependent)  |
| <i>Vibrio cholera</i>               | IIVGLCAVGT AIGFAVLGGKFLEGAARQPEMAPMLQVKMFI IAGLLDAVPMIGIVIALLETFANP   | (H <sup>+</sup> -dependent)  |
| <i>Escherichia coli</i>             | VMMGLAAIGAAIGIGILGGKFLEGAARQPDLIPLLRTQFFIVMGLVDAIPMI AVGLGLYVMFAVA    | (H <sup>+</sup> -dependent)  |
| <i>Bacillus subtilis</i>            | IAIGLGALGAGIGNGLIVSRTVEGIARQPEAGKELRTLMFMGIALVEALPII AVVIAFLAFFG . .  | (H <sup>+</sup> -dependent)  |

**Supplementary Fig. 6** | Alignment of the region of the subunit c of the ATP synthase containing the Na<sup>+</sup>-binding motif in the Na<sup>+</sup>-dependent enzymes. The amino-acids of the Na<sup>+</sup>-binding motif are highlighted in color (those that have amino acids shared with the H<sup>+</sup>-dependent enzymes in green and those that have different amino acids in orange). Notice that *Vampirococcus* has two positions with differences with the Na<sup>+</sup>-dependent enzymes, suggesting that it has a H<sup>+</sup>-dependent ATP synthase.

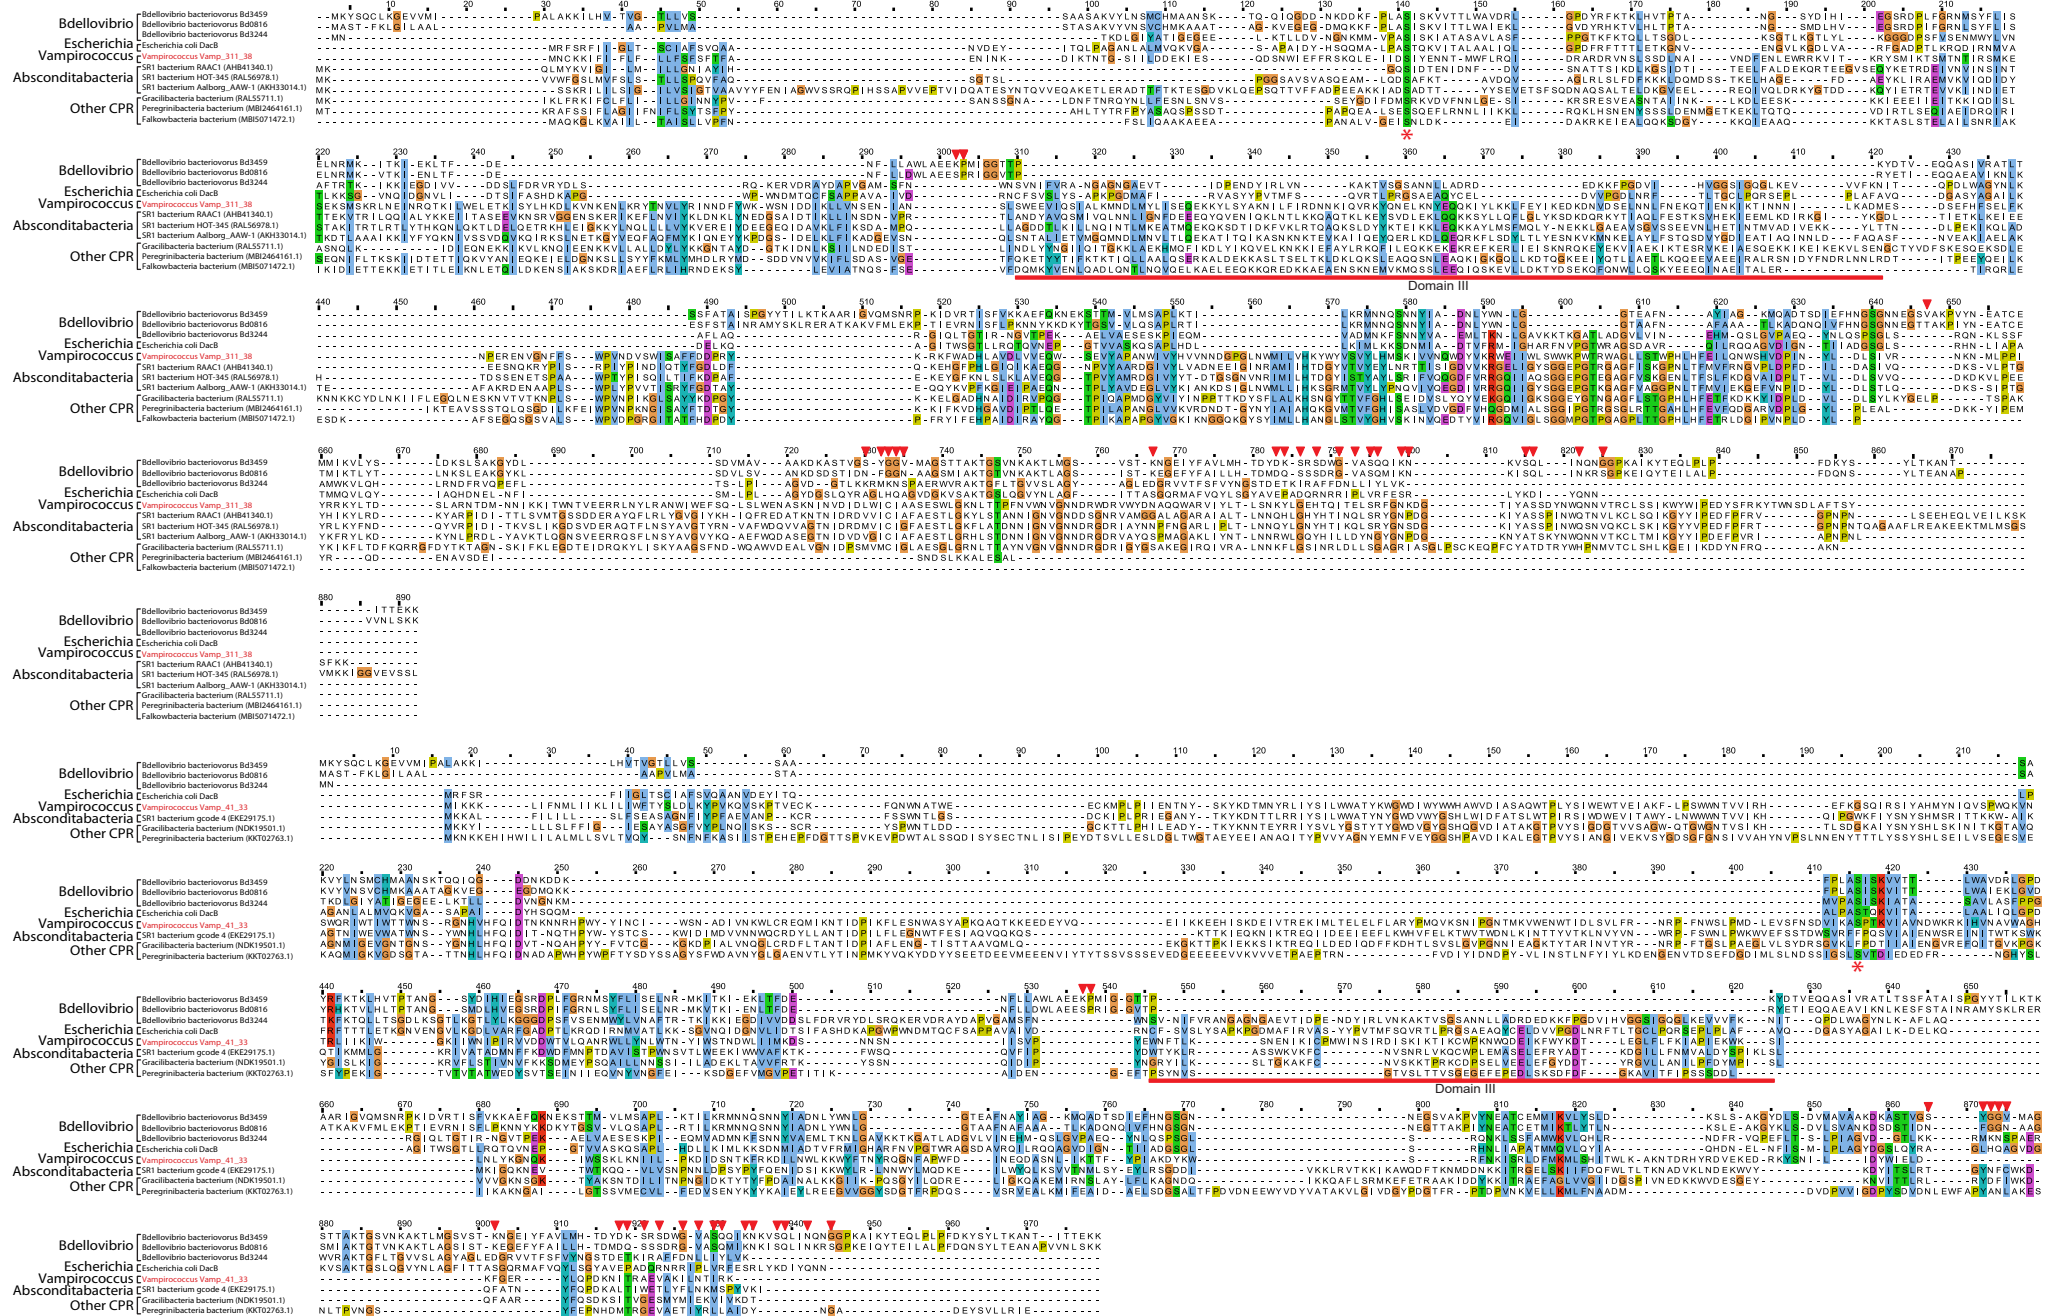

**Supplementary Fig. 7** | Alignment of the *Vampirococcus* DD endopeptidases with those of other bacteria, including the *Bdellovibrio* 'predatory' (Bd3459 and Bd0816) and self-wall (Bd3244) endopeptidases. The active site serine residue is indicated with a red asterisk, the regulatory domain III is underlined in red, and the positions that interact in the *Bdellovibrio* 'predatory' endopeptidases with the self-protective inhibitor Bd3460 are marked with red triangles. Amino acids are colour coded according to the 'clustal' color palette implemented in Jalview.

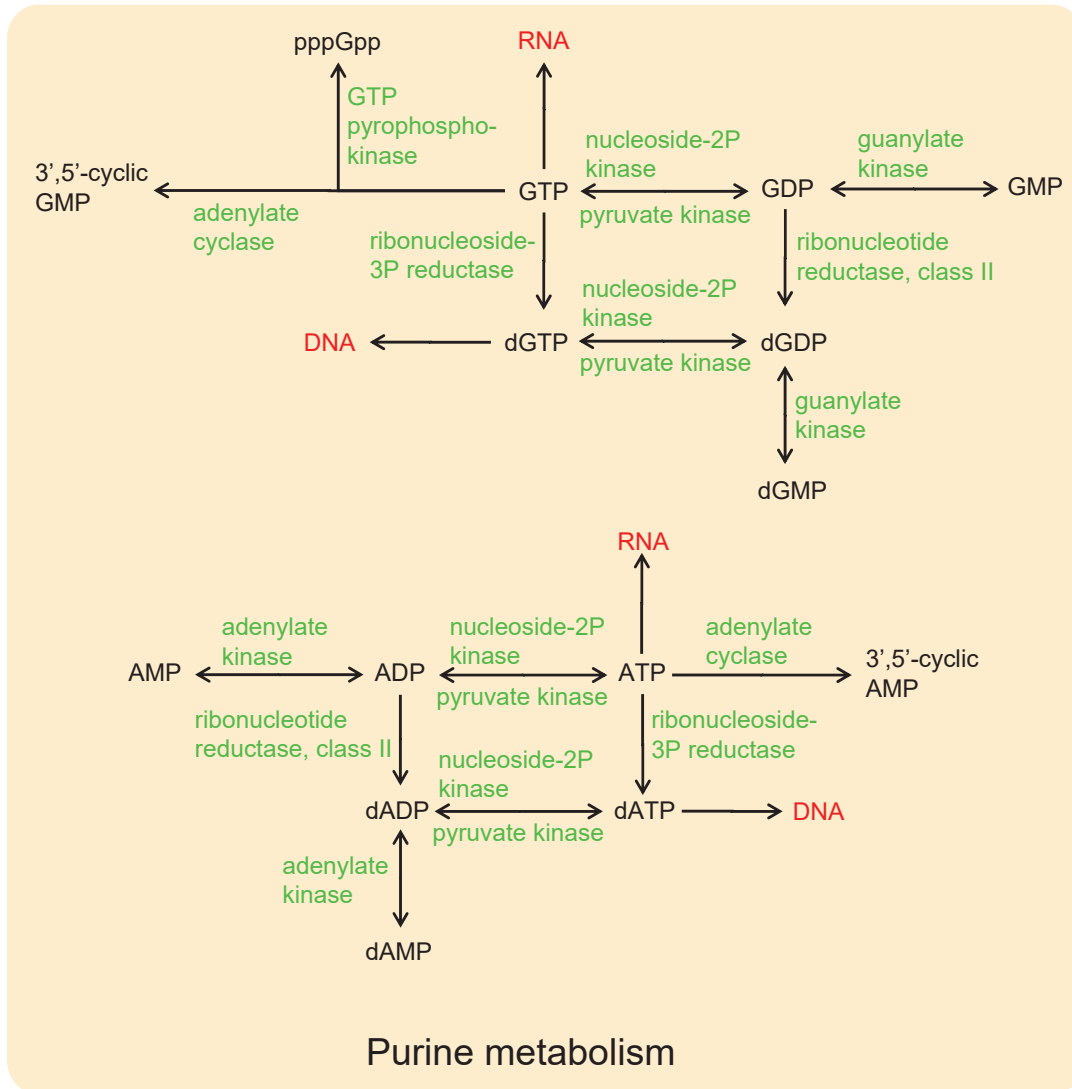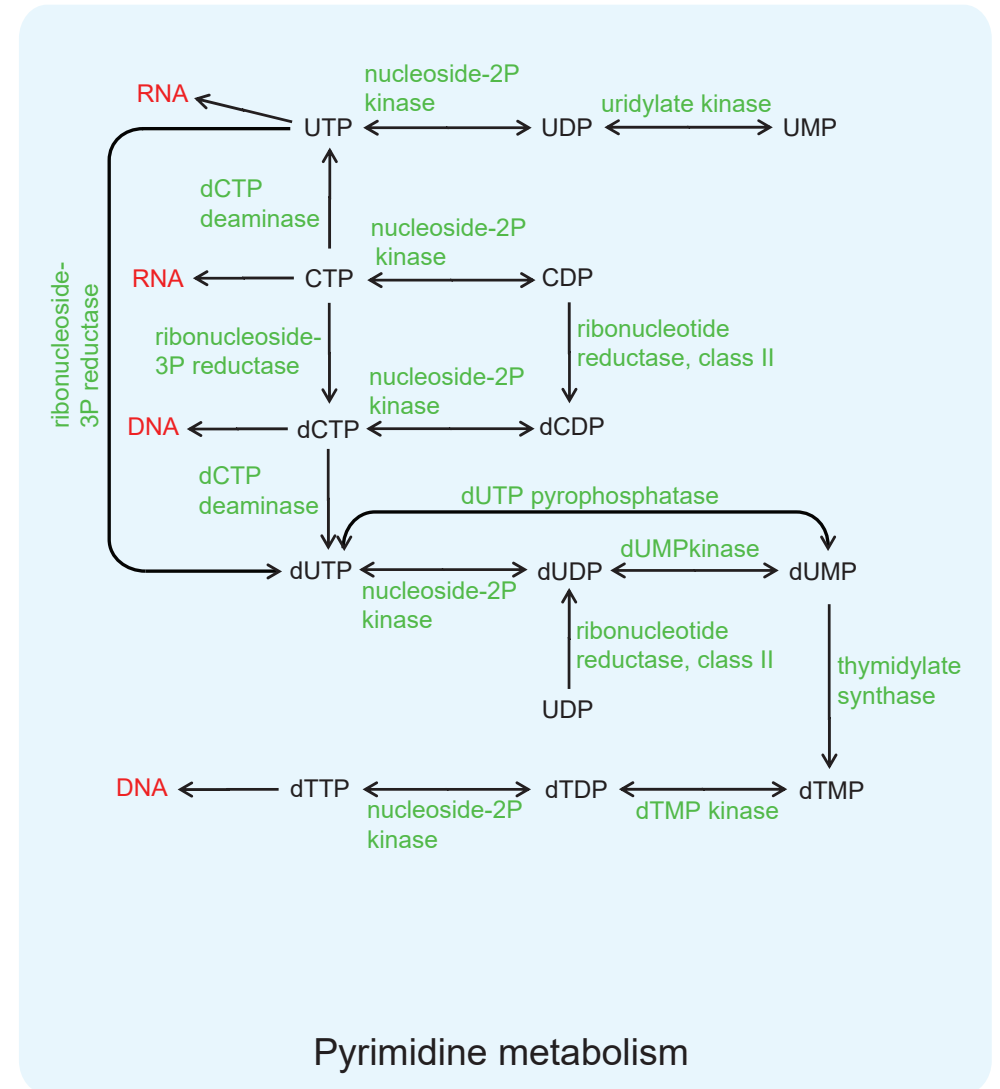

**Supplementary Fig. 8]** Main pathways involved in purine and pyrimidine metabolism in *Vampirococcus*. Substrates are indicated in black, enzymes in green, and DNA and RNA in red.



Class II type V

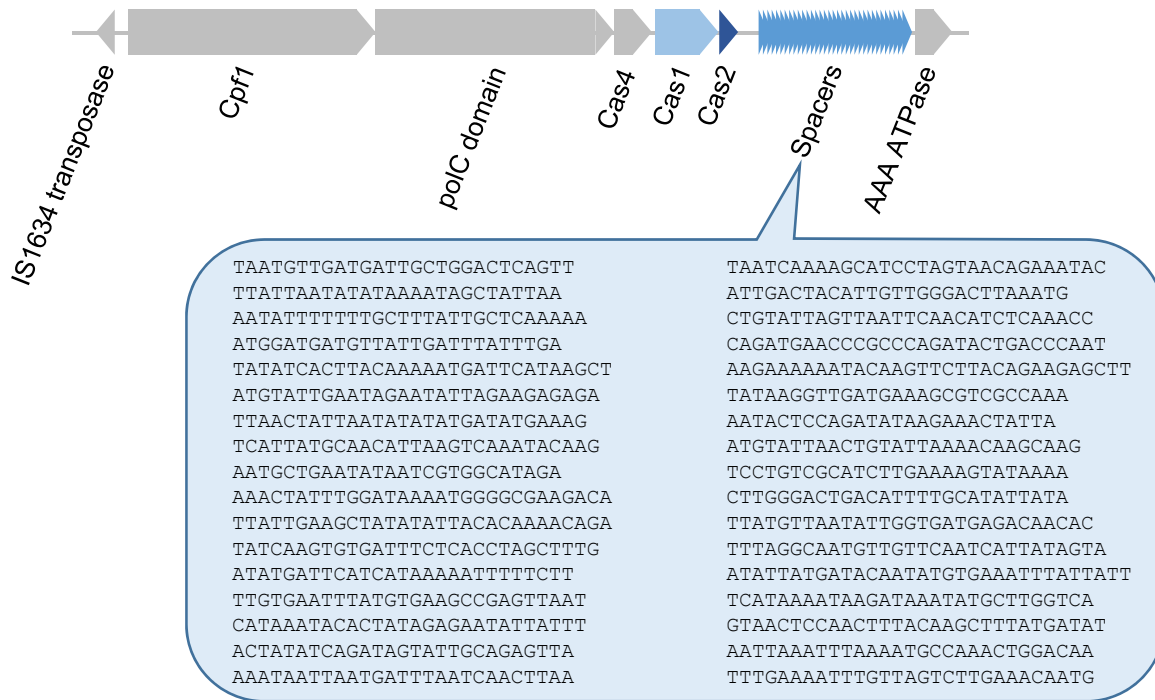

Class I type III

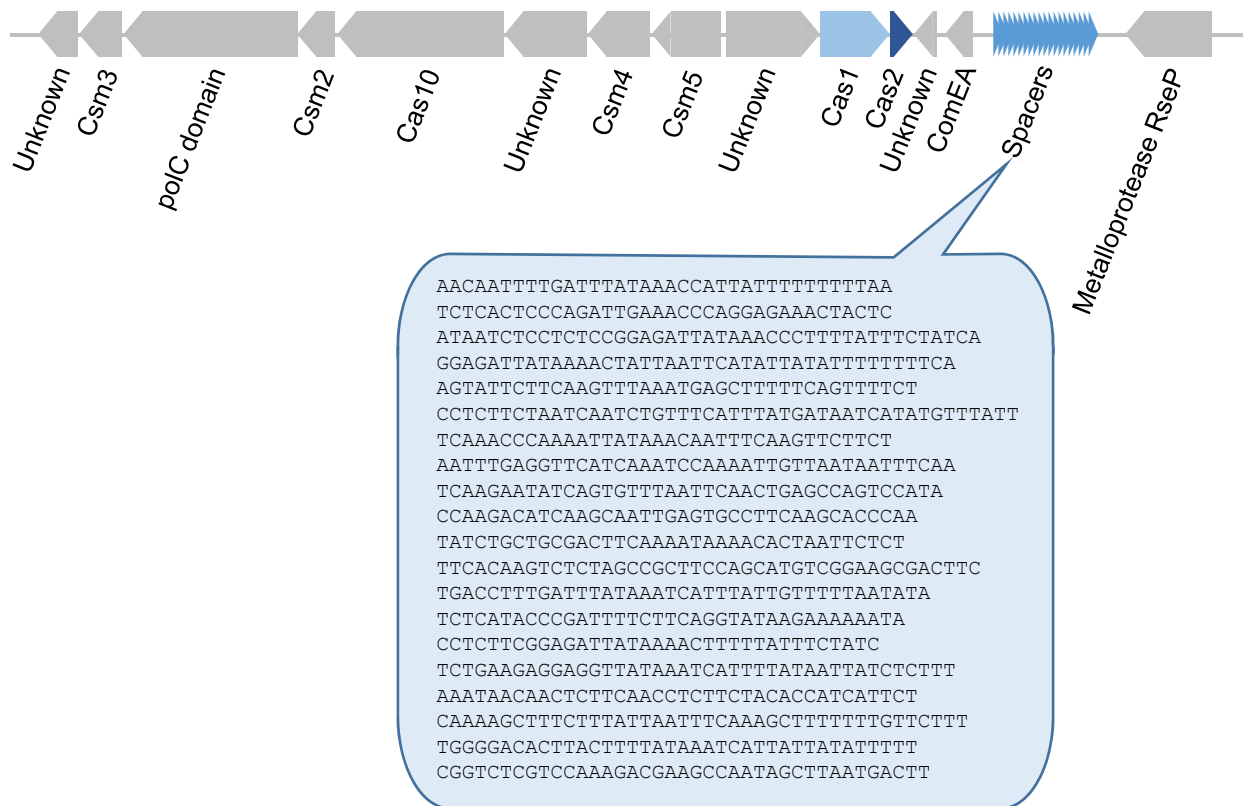

**Supplementary Fig. 9]** The two CRISPR-Cas loci of *Vampirococcus* and their corresponding spacer sequences. Elements that are shared by the two loci are indicated in blue.

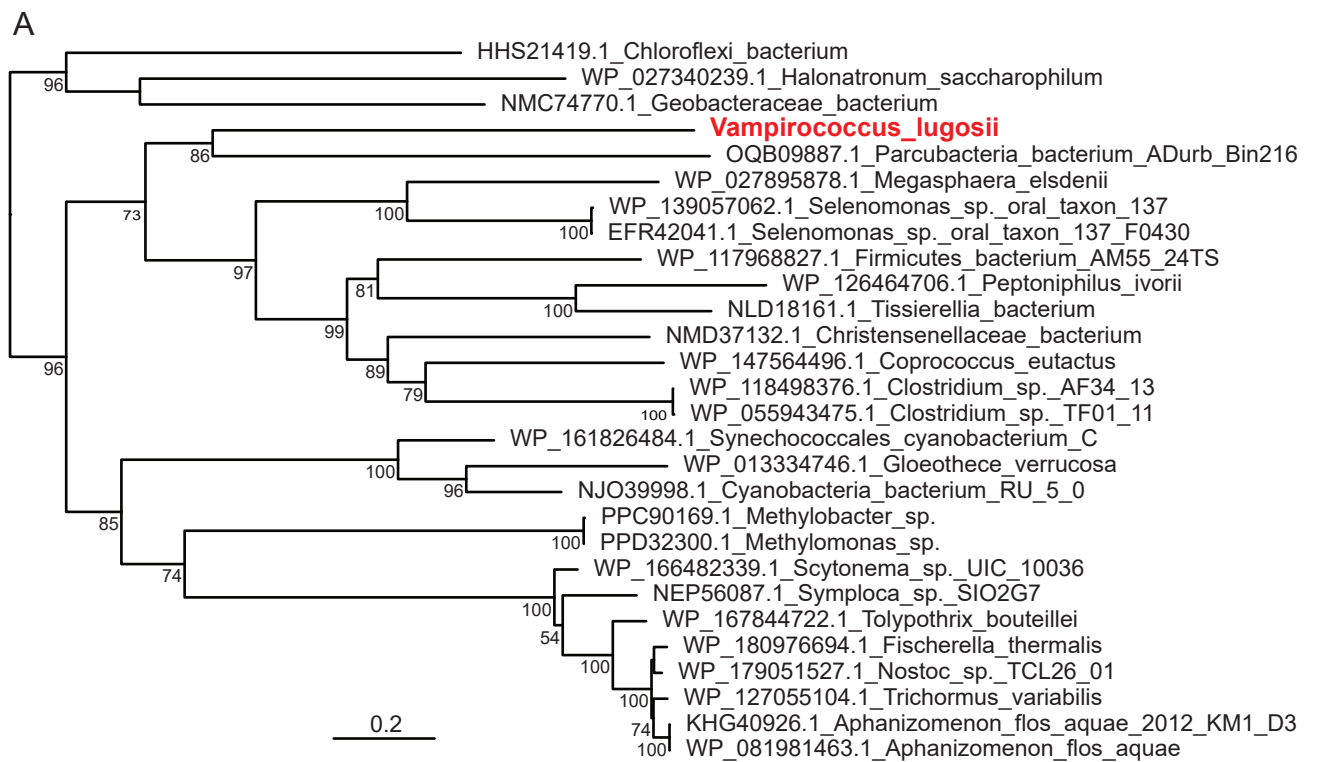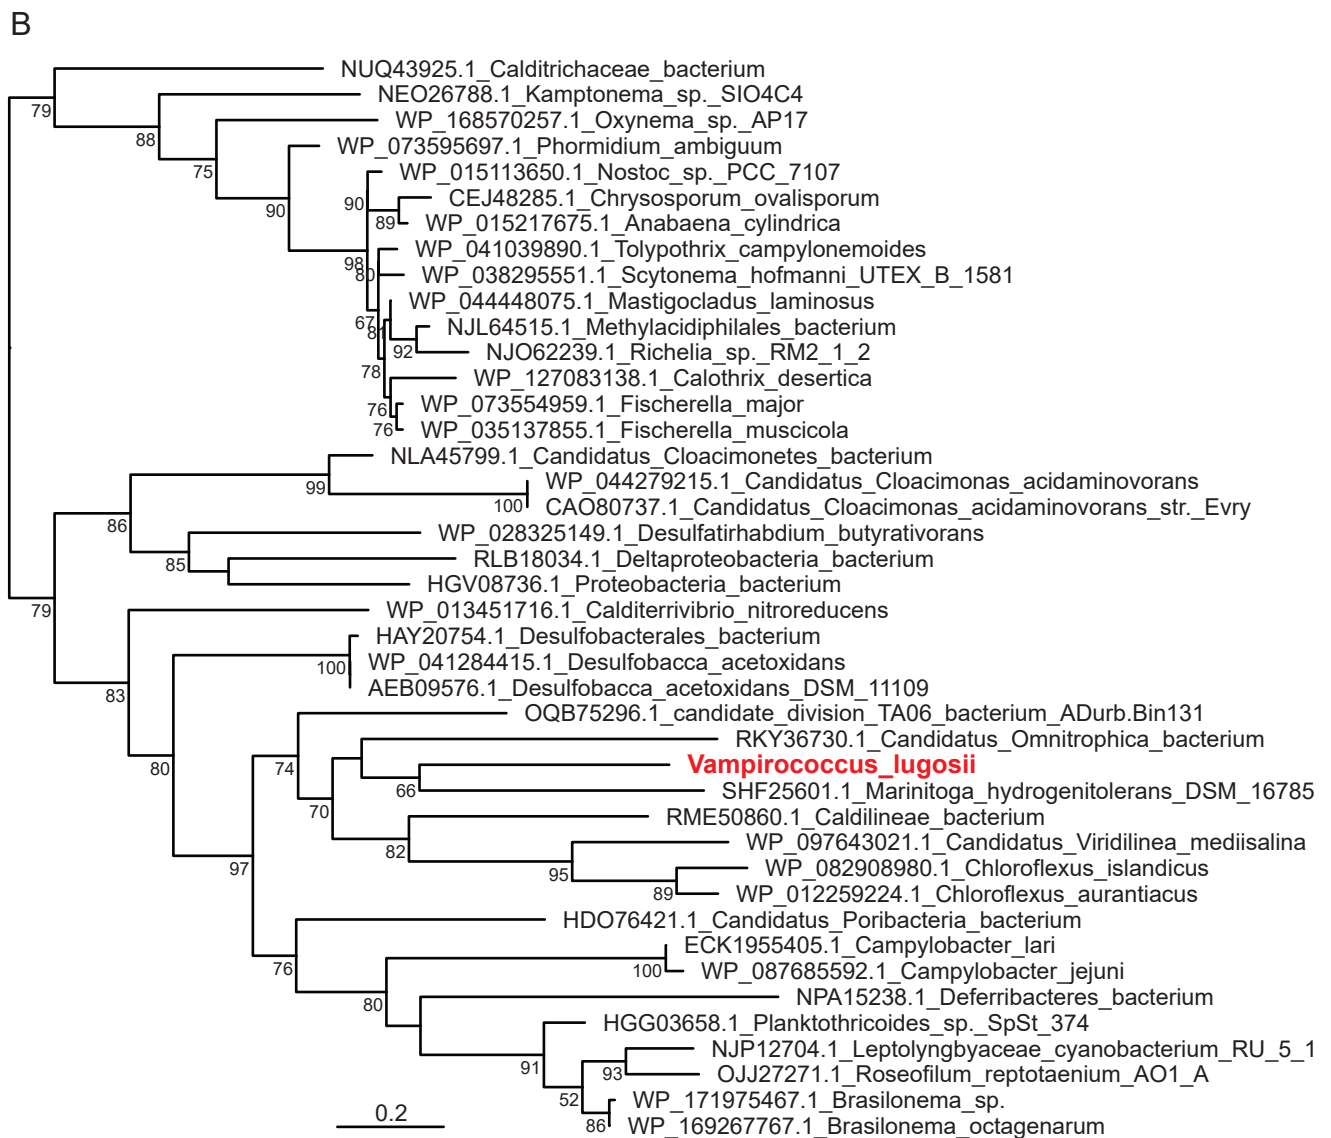

**Supplementary Fig. 10|** Maximum likelihood phylogenetic trees of *Vampirococcus* type I class III CRISPR-Cas enzymes Cas1 'A' (A) and Cas2 (B). The trees are based on 349 and 118 conserved aligned positions, respectively. Numbers at nodes are bootstrap support values (100 replicates, only values >50% are shown).

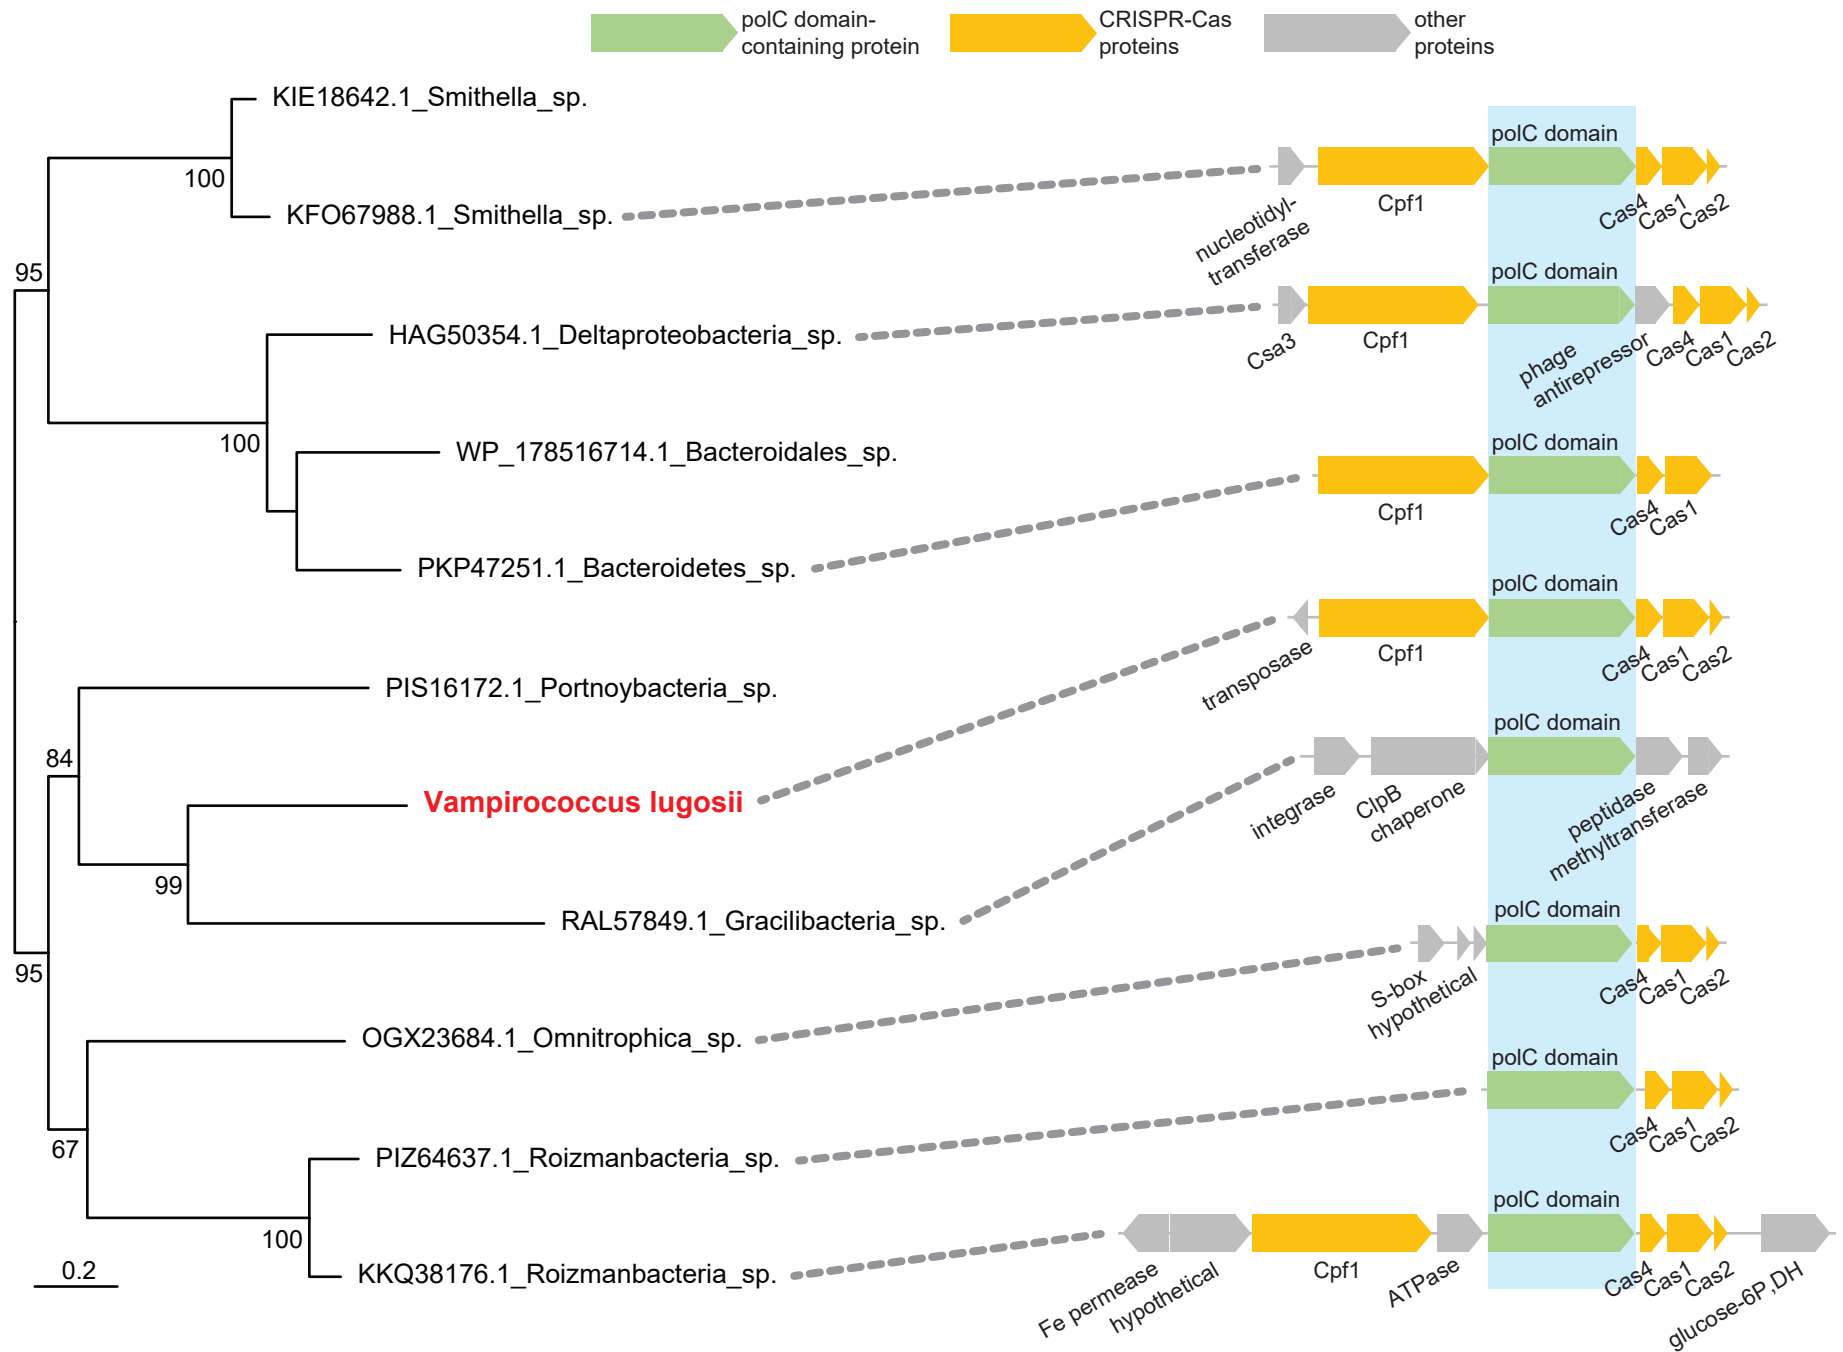

**Supplementary Fig. 11** Maximum likelihood phylogeny and genomic context of the *Vampirococcus* polC domain-containing protein associated to the class II type V CRISPR-Cas system. The genomic context is shown for the species for which genome sequence data are available. The polC domain-containing protein is shown in green and typical CRISPR-Cas proteins are shown in orange.

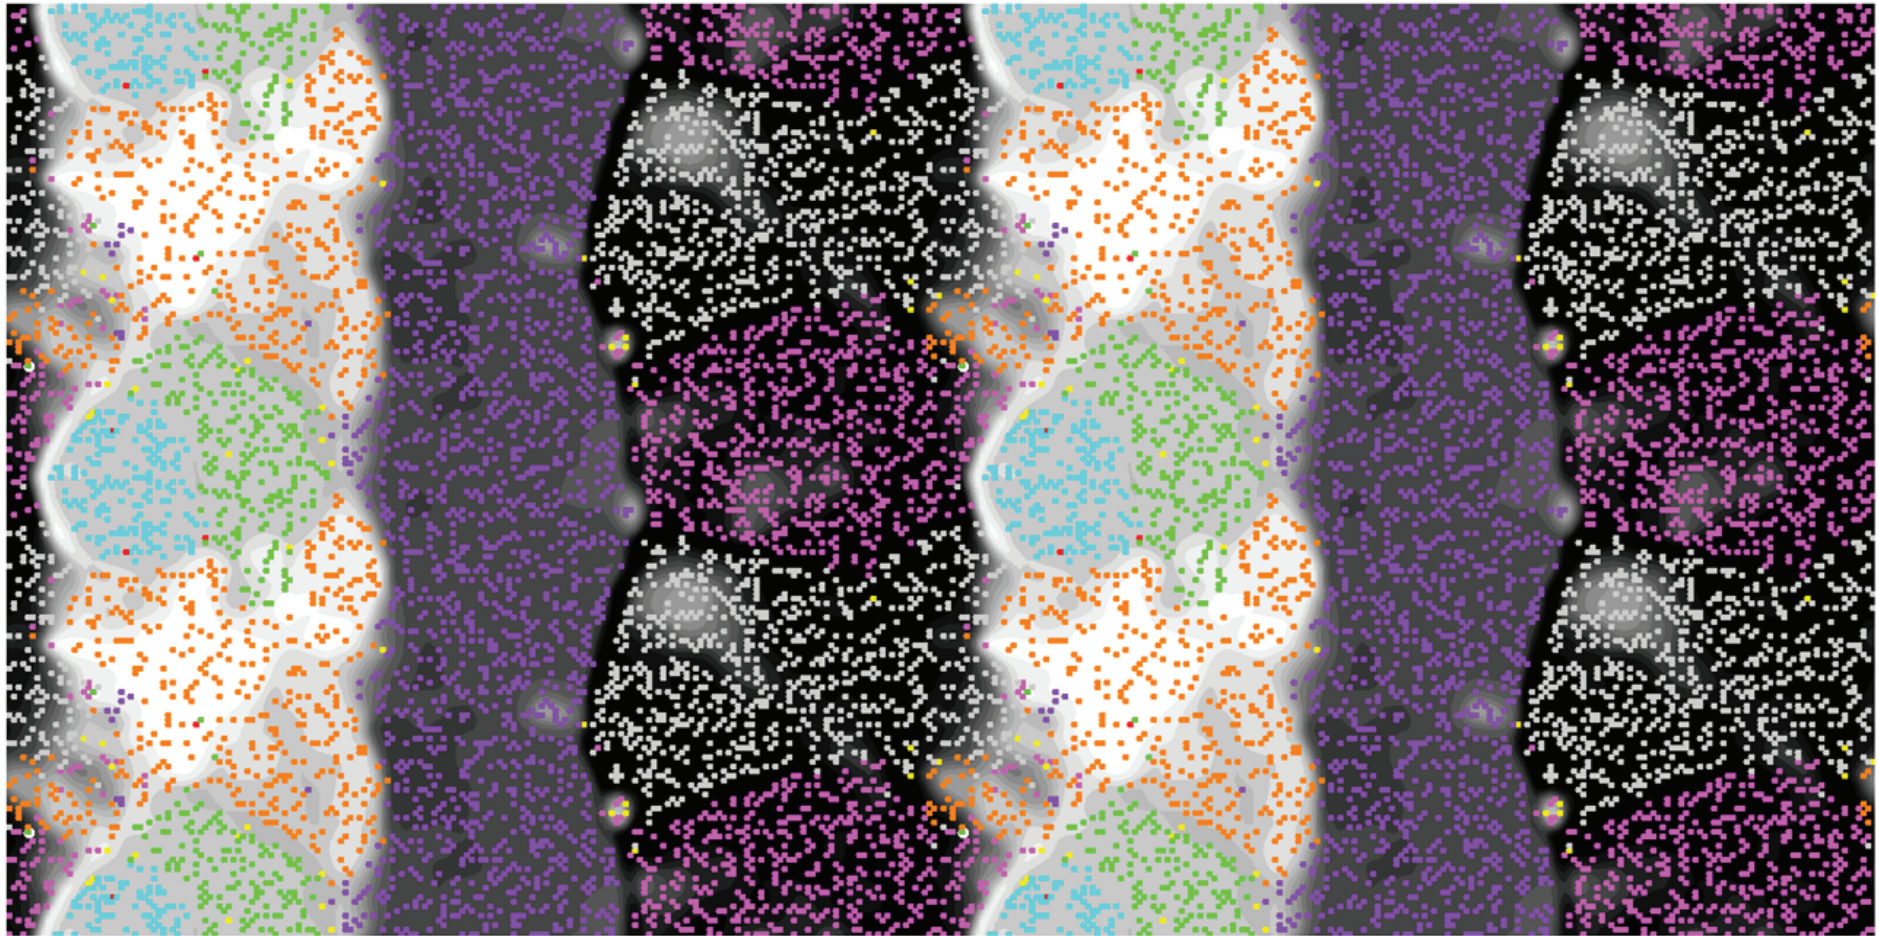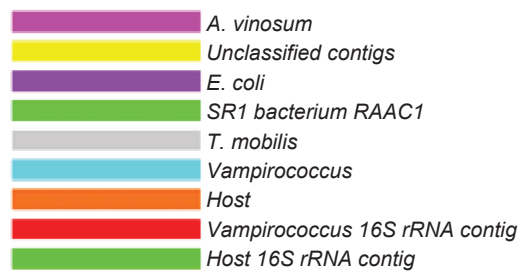

**Supplementary Fig. 12** | Visualization of the ESOM map of the assembled DNA contigs of *Vampirococcus*, its host, and several reference genomes.

| <b>Protein</b>    | <b>Function</b>                         | <b>Size</b> |
|-------------------|-----------------------------------------|-------------|
| VAMP_16_20        | hypothetical protein                    | 4163        |
| VAMP_134_102      | NAD(P)-dependent dehydrogenase          | 2400        |
| VAMP_6_203        | alpha-2 macroglobulin                   | 2368        |
| VAMP_166_2        | hypothetical protein                    | 2284        |
| VAMP_19_245       | alpha-2 macroglobulin                   | 1895        |
| VAMP_328_89       | membrane protein                        | 1883        |
| VAMP_95_65        | YfaS, alpha-2 macroglobulin family      | 1871        |
| VAMP_54_69        | hypothetical protein                    | 1723        |
| VAMP_17-88-45_126 | PKD repeat-containing protein           | 1396        |
| VAMP_98_96        | DNA-binding beta propeller protein YncE | 1392        |

**Supplementary Table 1| Ten largest proteins encoded in the *Vampirococcus* genome.**

| <b>Primer name</b> | <b>Target</b> | <b>Sequence</b>      |
|--------------------|---------------|----------------------|
| B-27F              | 16S rRNA gene | AGAGTTTGATCCTGGCTCAG |
| 1492R              | 16S rRNA gene | GGTACCTTGTTACGACTT   |

**Supplementary Table 2| Primers used in our study.**
